# Supplementary material for: ANKRD49 promotes the metastasis of NSCLC via activating JNK-ATF2/c-Jun-MMP-2/9 axis
Source: Springer Nature journal article supplement (doi:10.1186/s12885-023-11612-9), 2023-11-14
Supplement: MOESM3 [file 26302394]

**Figure 2B**

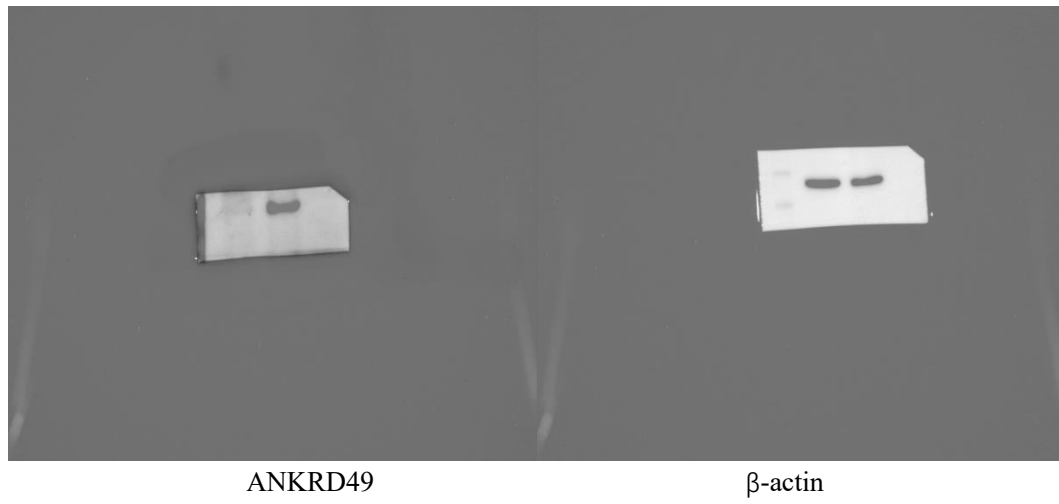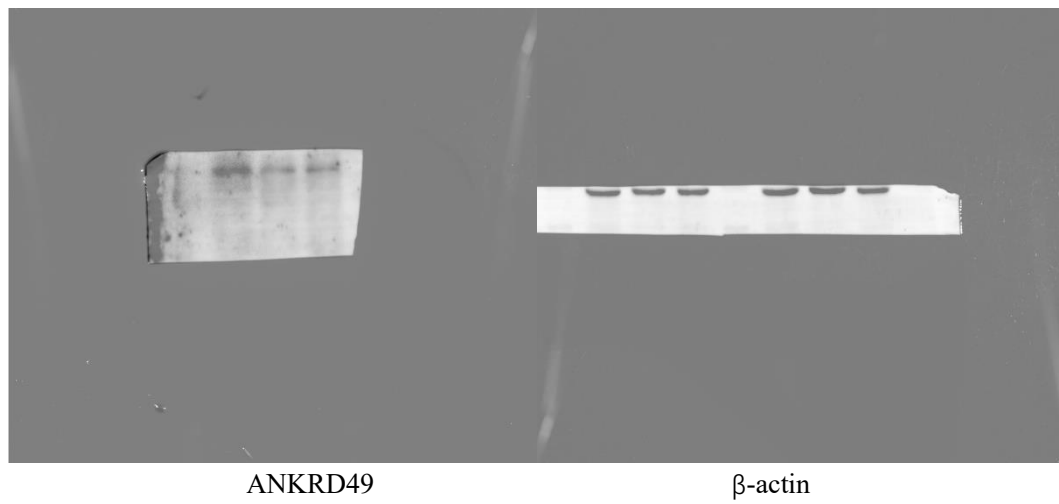

**Figure 3B**

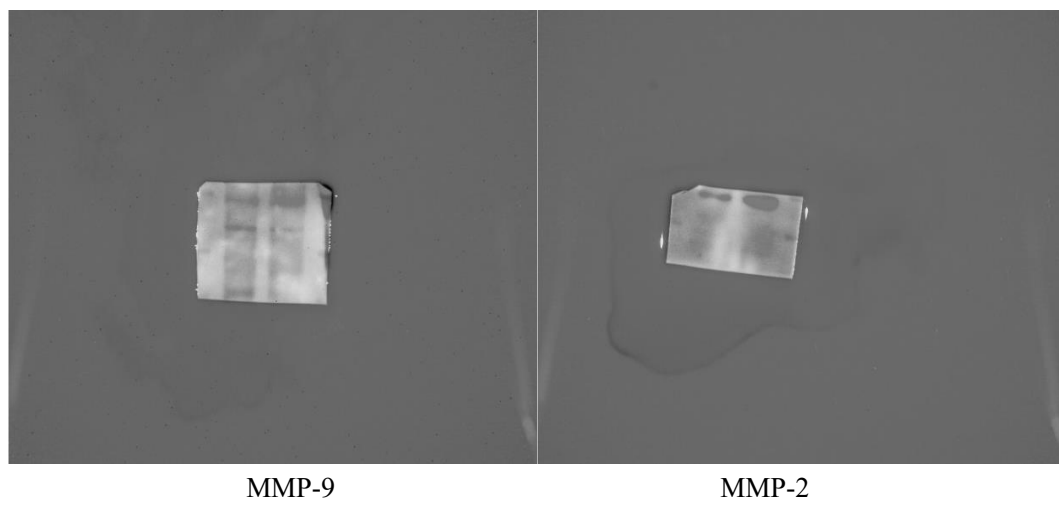

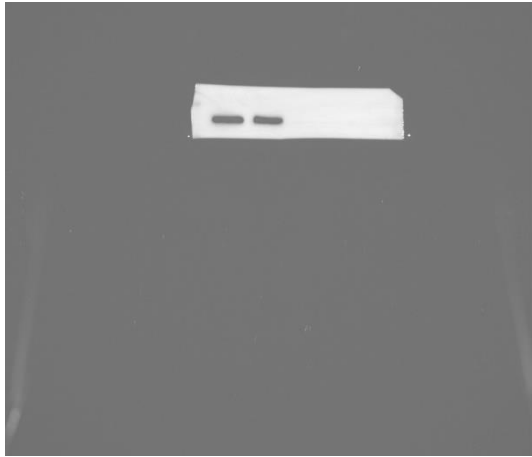

$\beta$ -actin

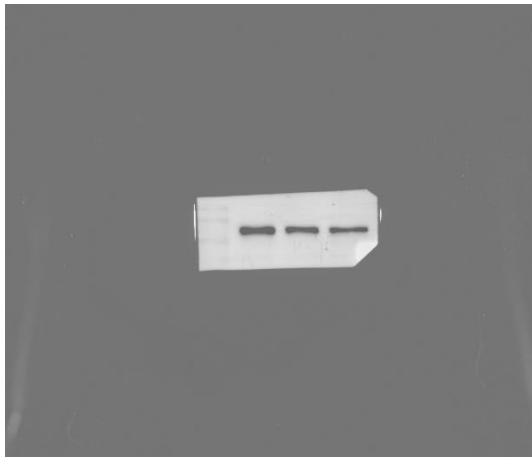

MMP-9

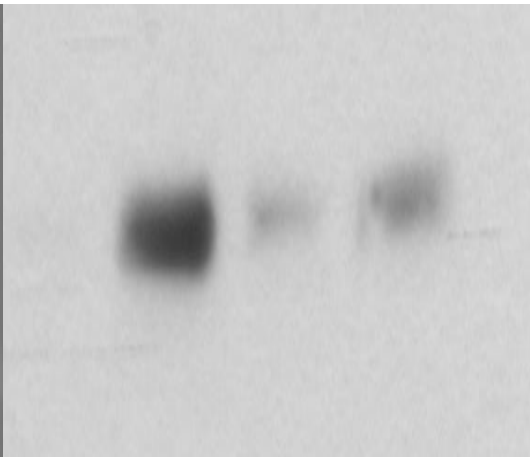

MMP-2

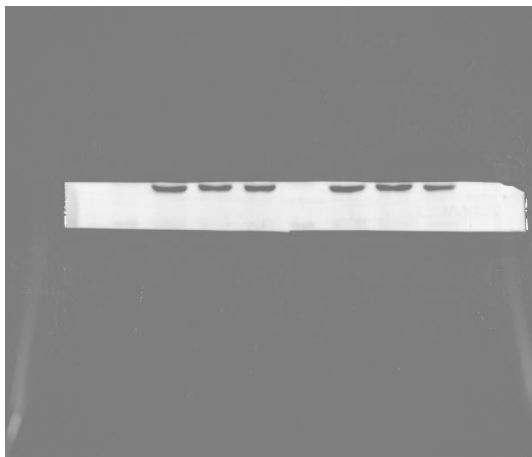

$\beta$ -actin

**Figure 3C**

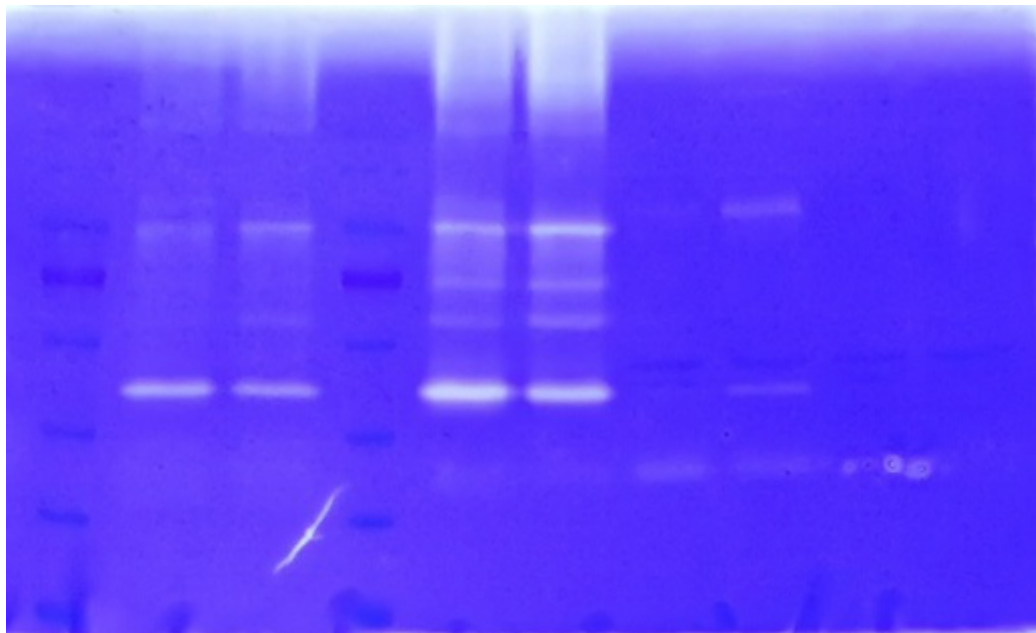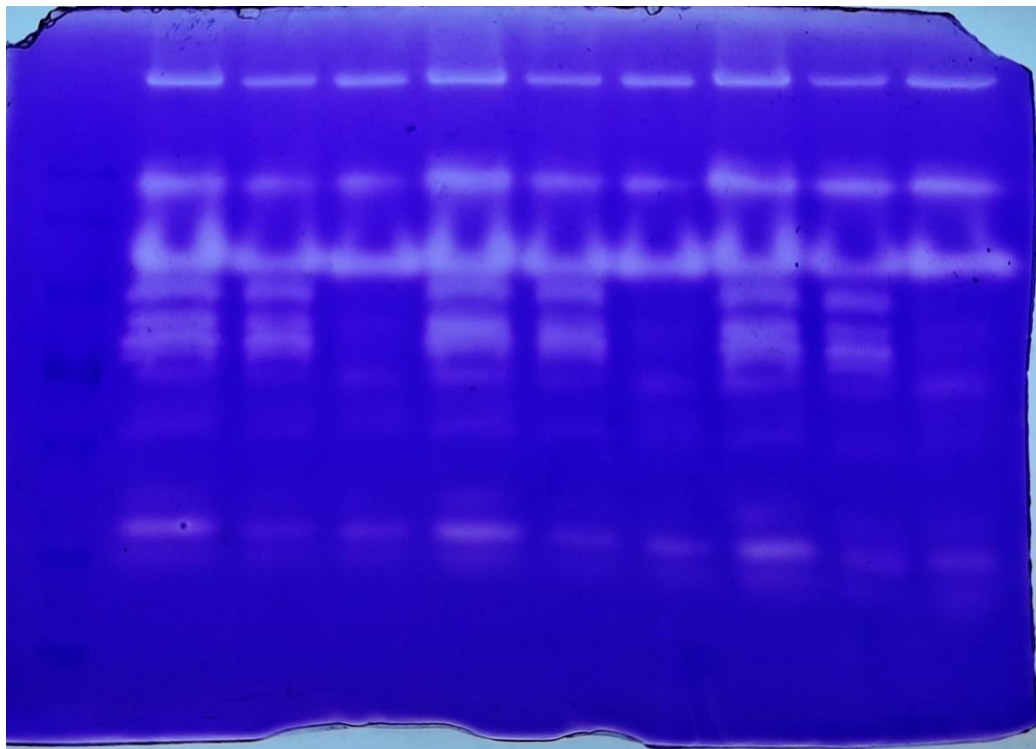

**Figure 4A**

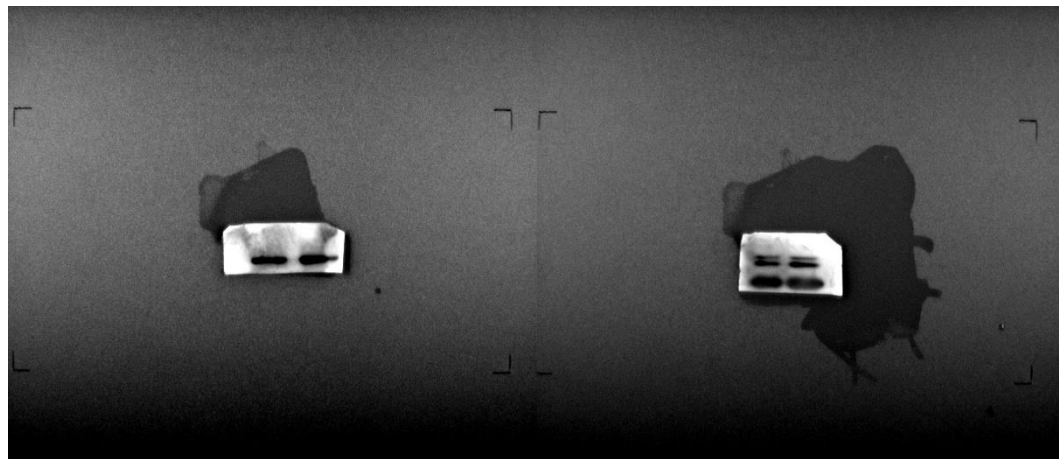

ERK

p-ERK

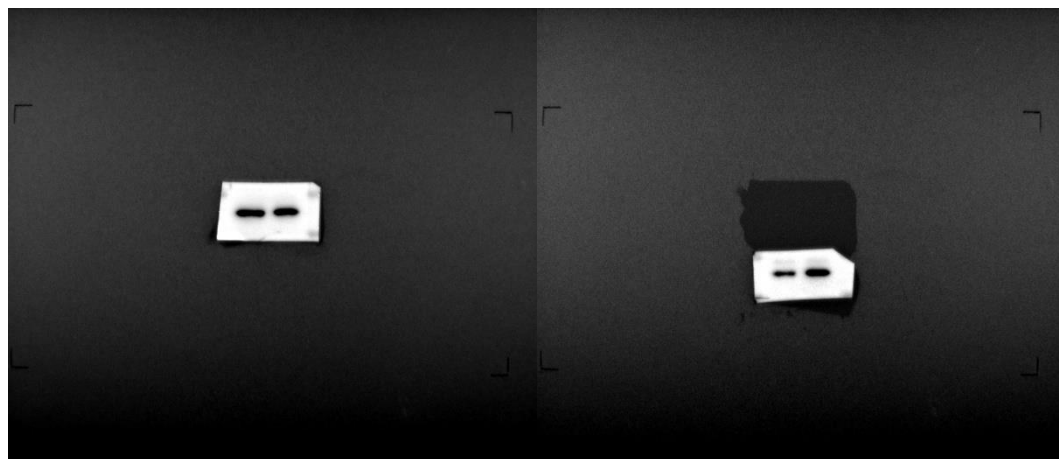

p38

p-p38

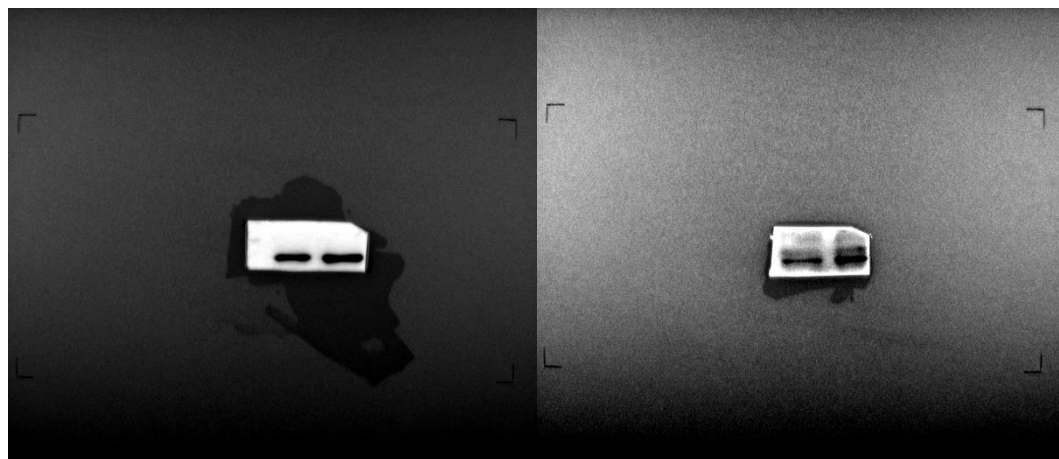

JNK

p-JNK

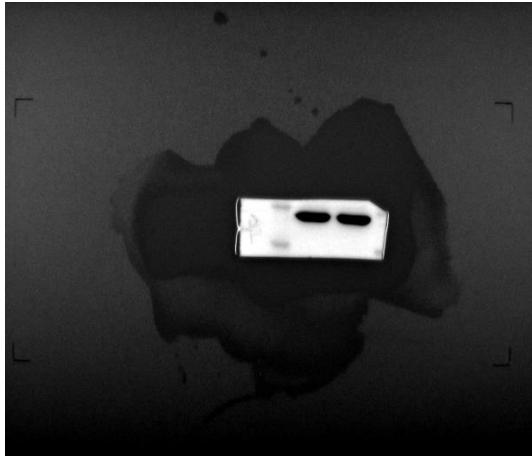

$\beta$ -Tubulin

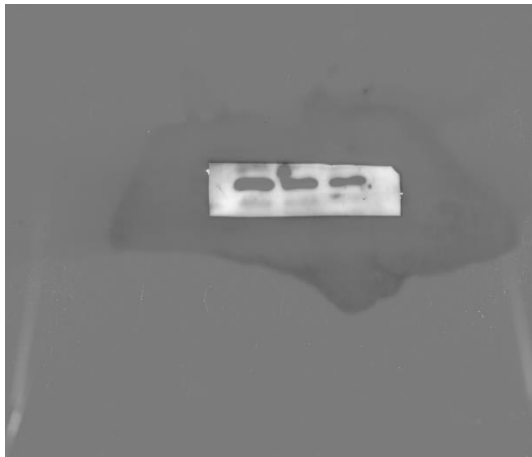

p38

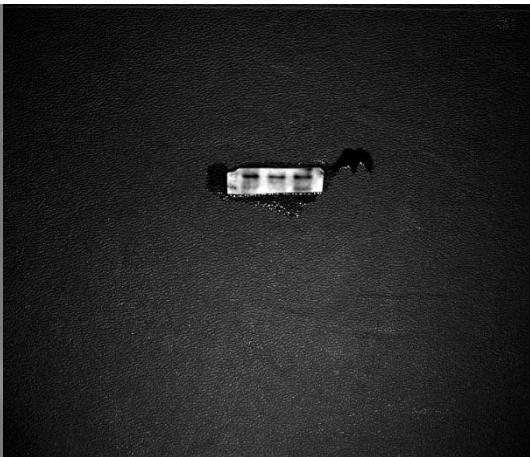

p-p38

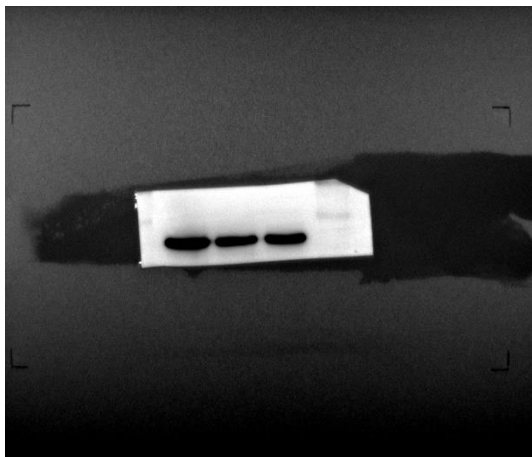

JNK

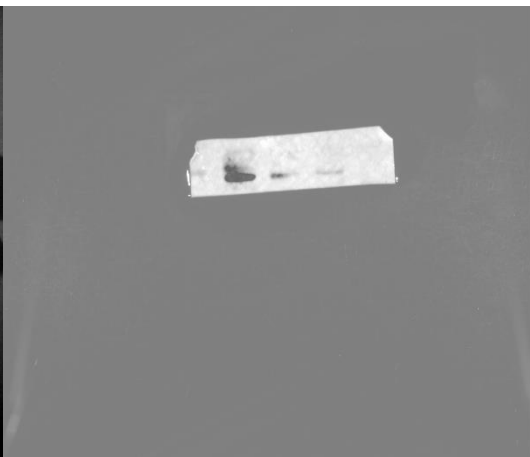

p-JNK

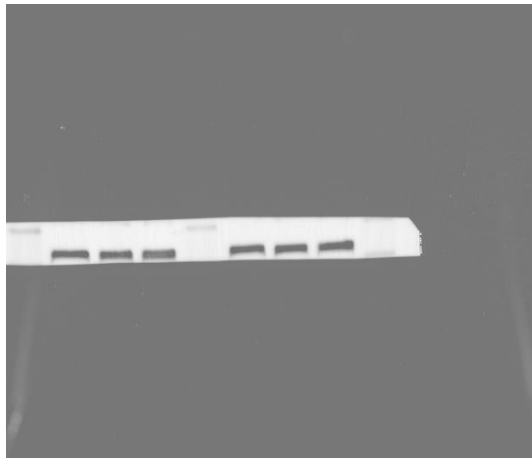

$\beta$ -Tubulin

**Figure 4B**

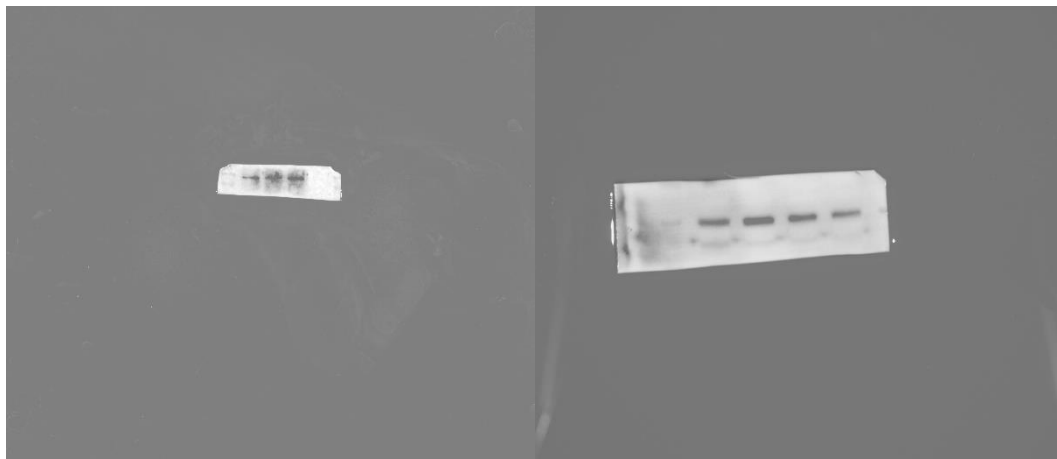

MMP-9

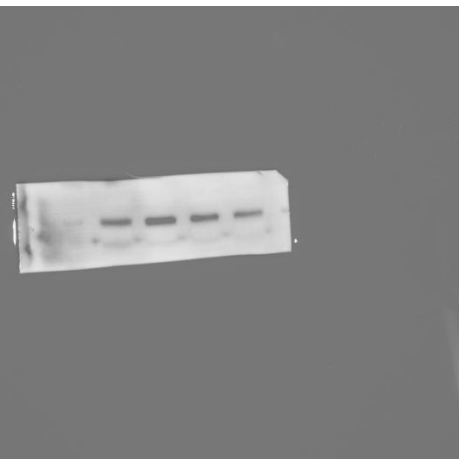

MMP-2

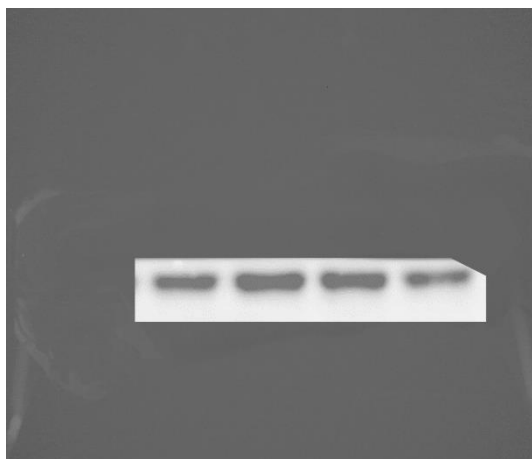

JNK

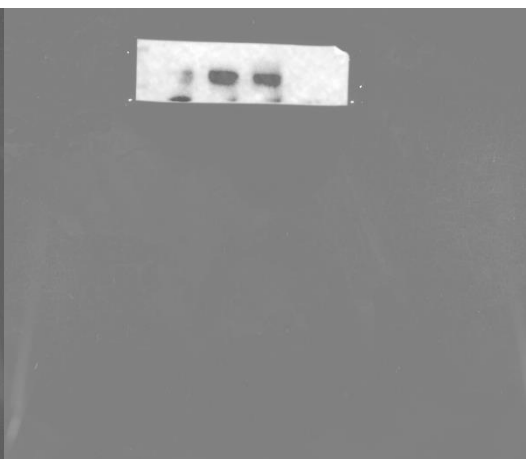

p-JNK

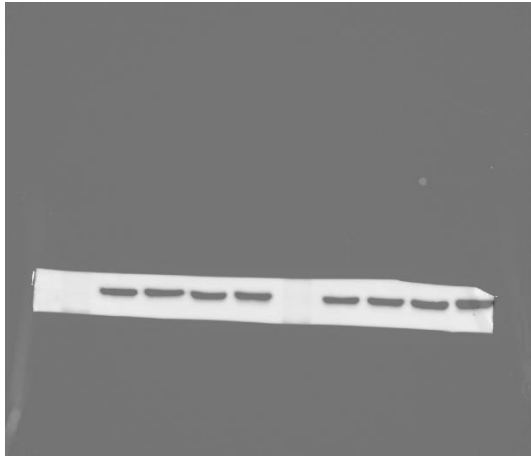

$\beta$ -Tubulin

**Figure 4C**

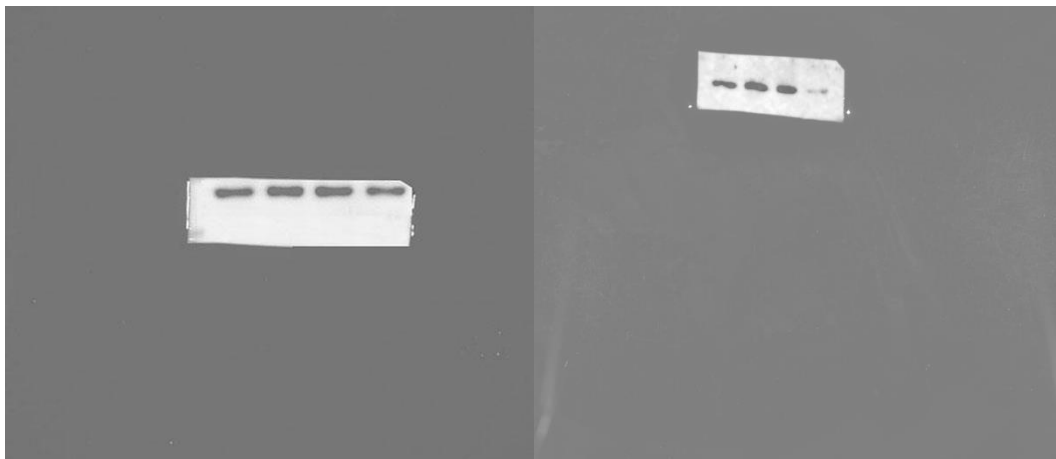

p38

p-p38

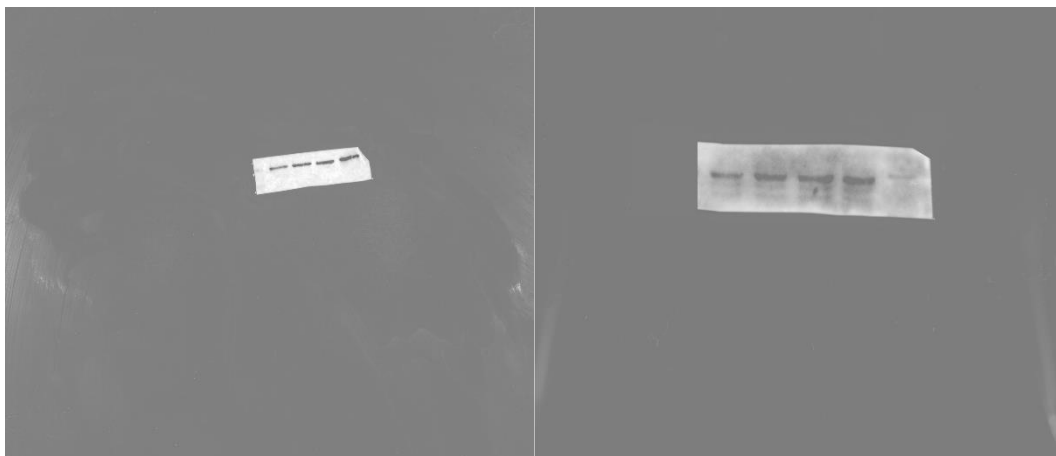

MMP-9

MMP-2

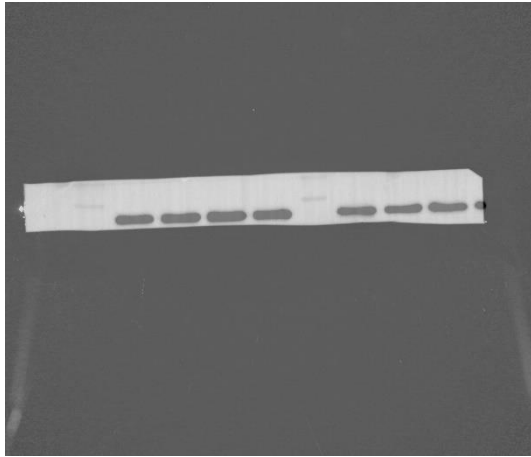

$\beta$ -Tubulin

**Figure 4F**

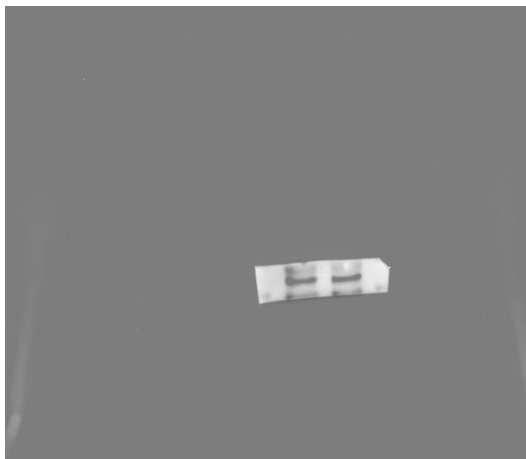

c-Jun

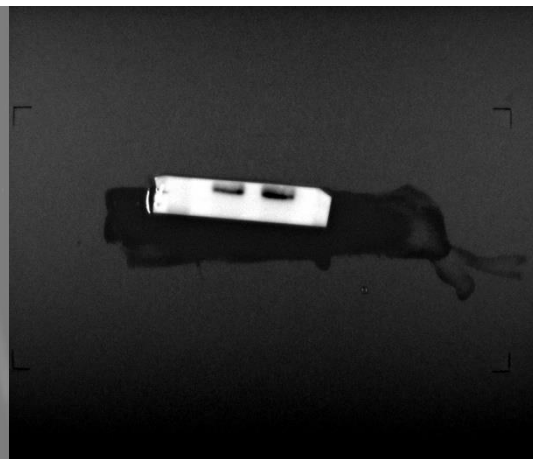

p-c-Jun

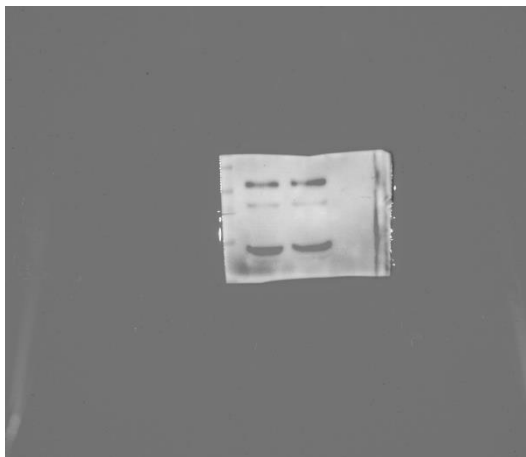

ATF2

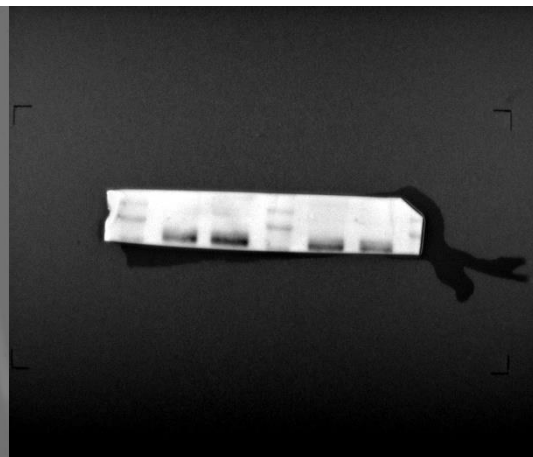

p-ATF2



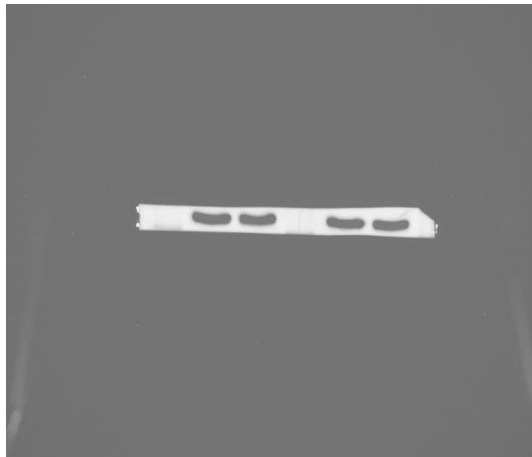

$\beta$ -Tubulin

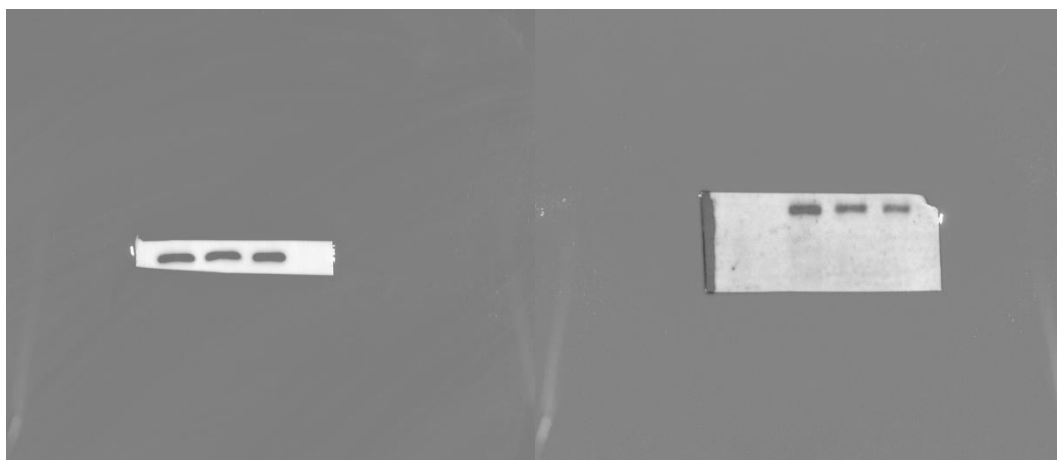

c-Jun

p-c-Jun

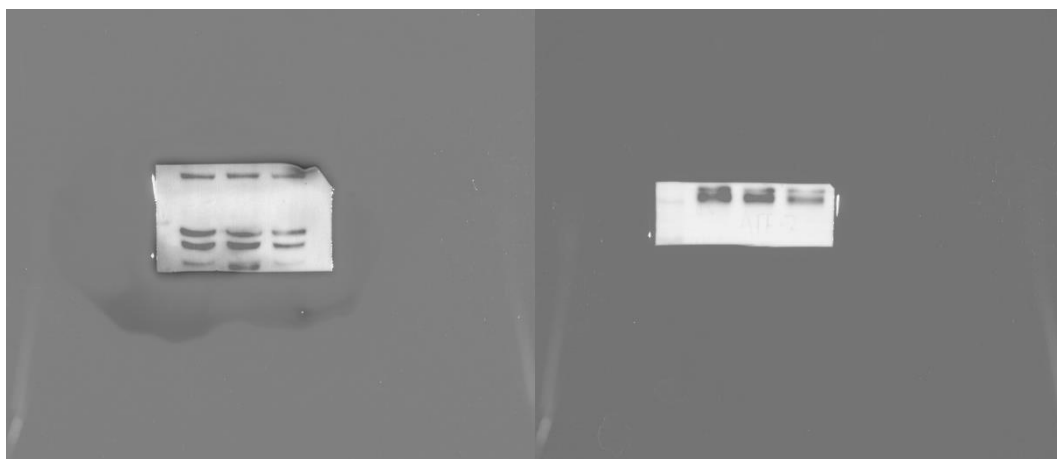

ATF2

p-ATF2

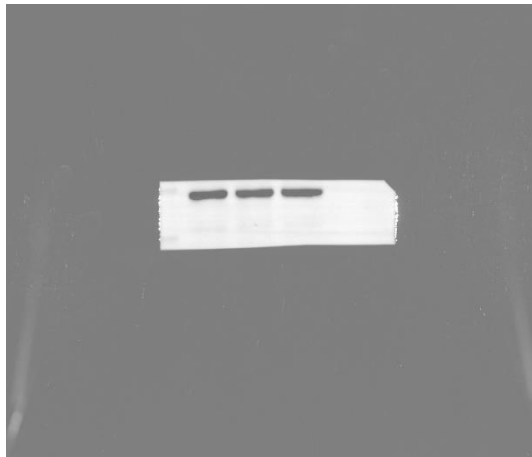

$\beta$ -Tubulin

**Figure 4G**

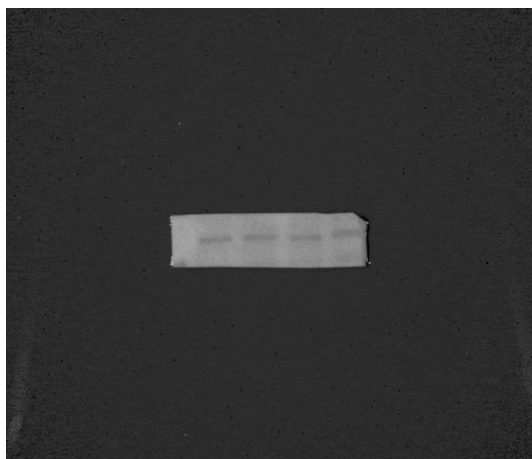

c-Jun

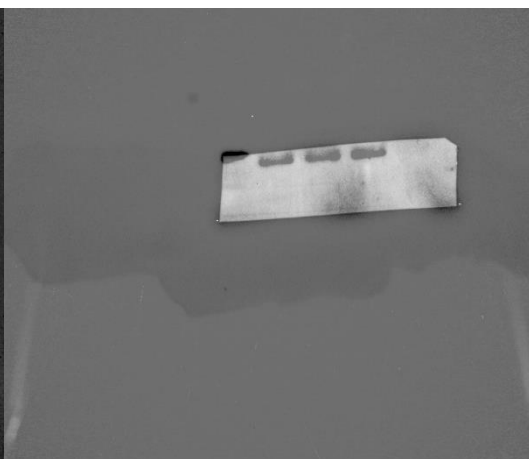

p-c-Jun

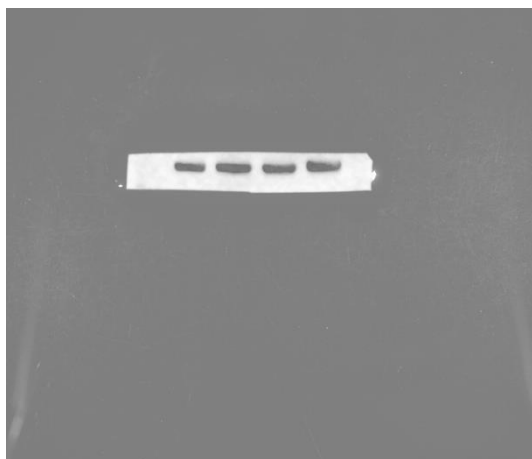

ATF2

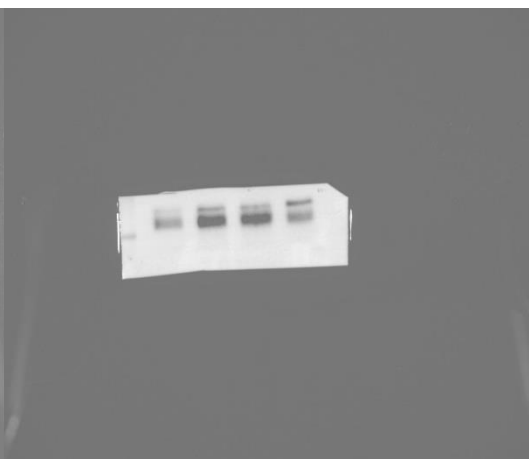

p-ATF2

**Figure 4G**

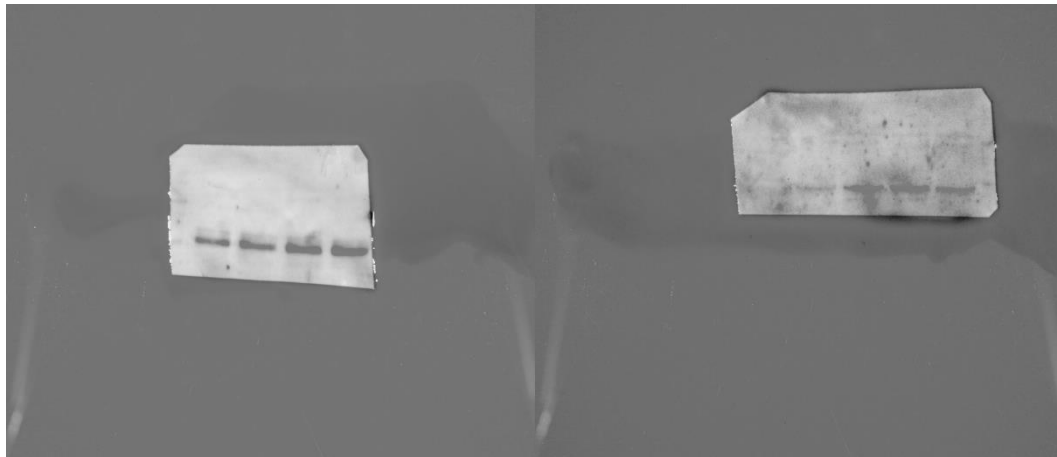

ATF2

p-ATF2

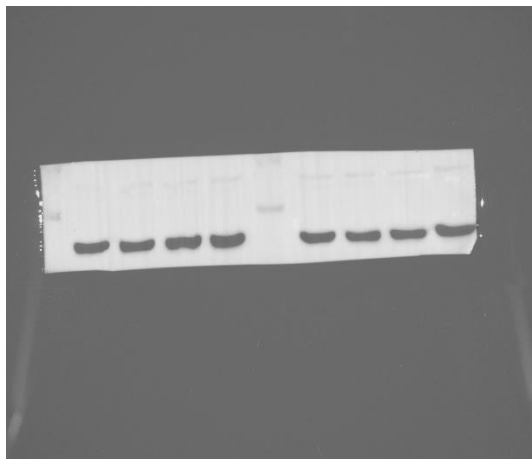

$\beta$ -Tubulin

**Figure 5A**

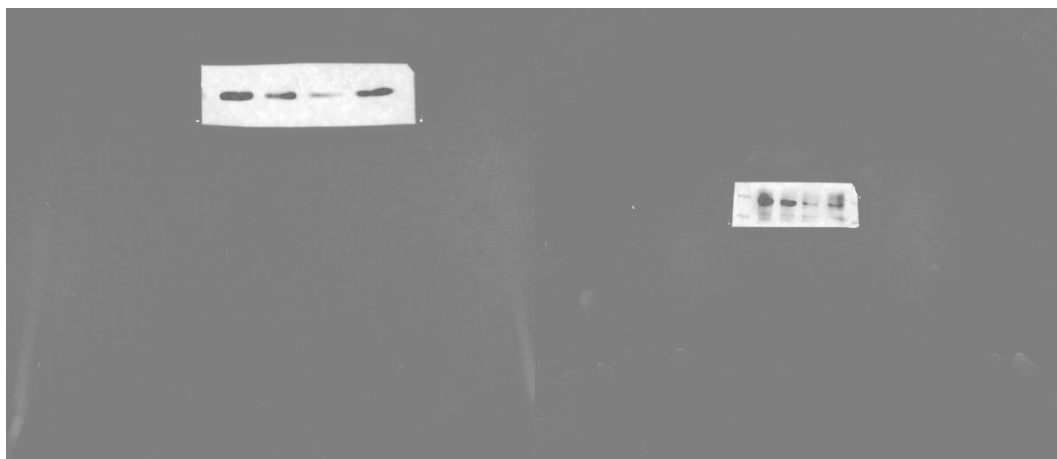

c-Jun

ATF2

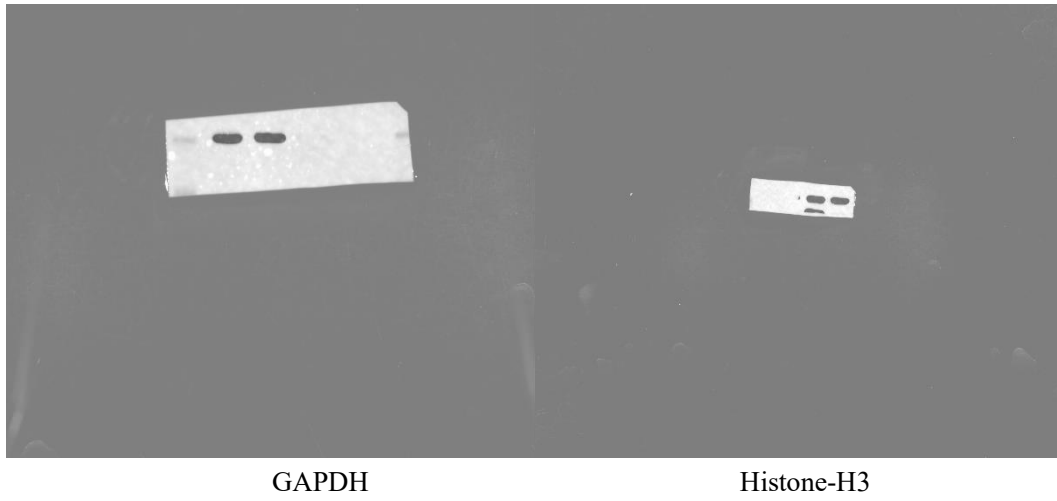

**Figure 5B**

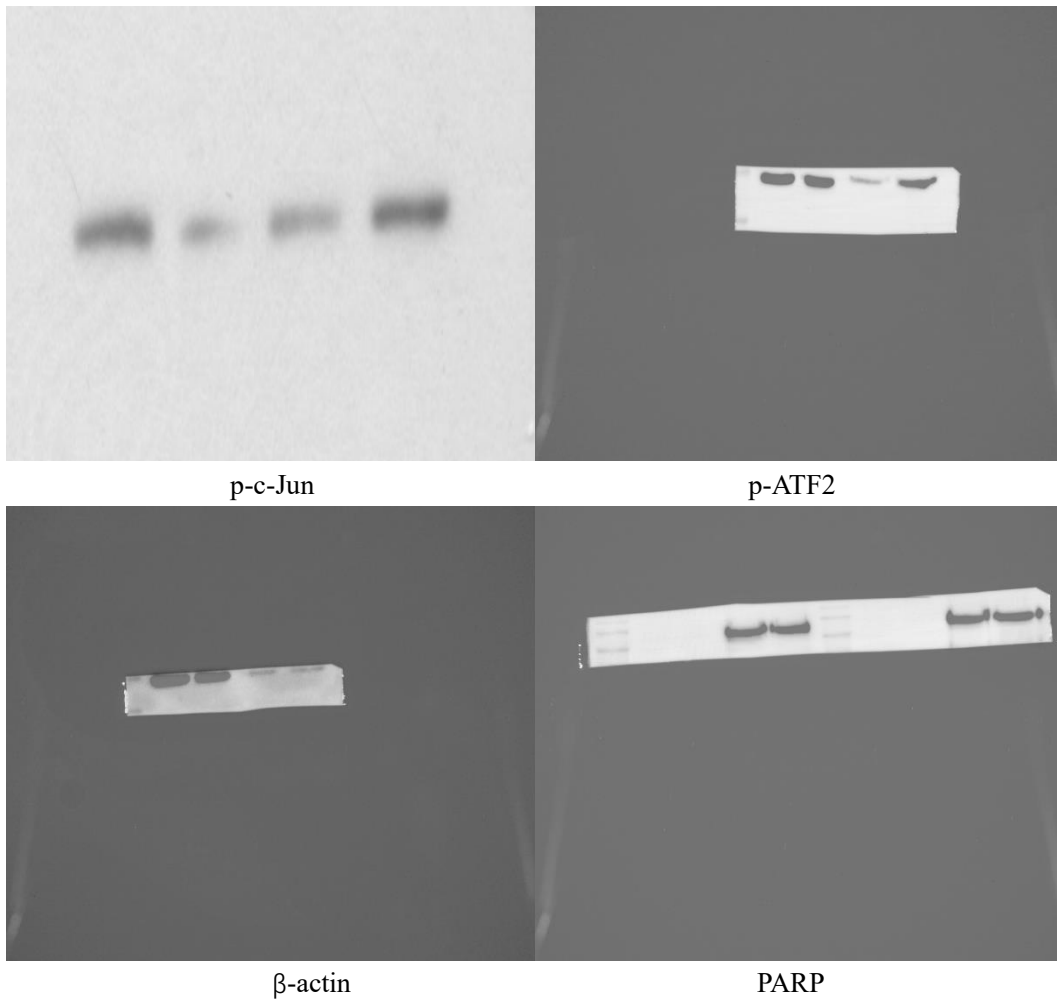

**Figure 5C**

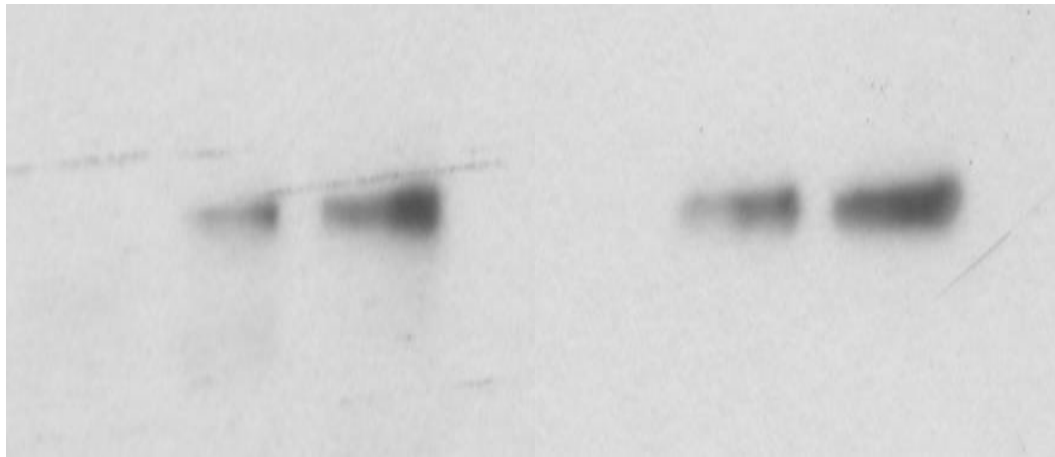

Input p-ATF2

Input p-c-Jun

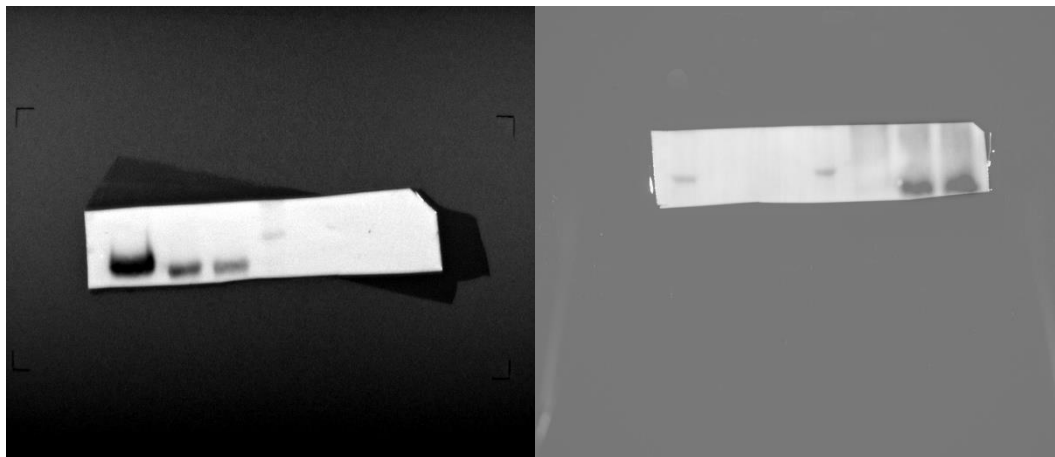

Ip p-ATF2

Ip p-c-Jun

**Figure 5E**

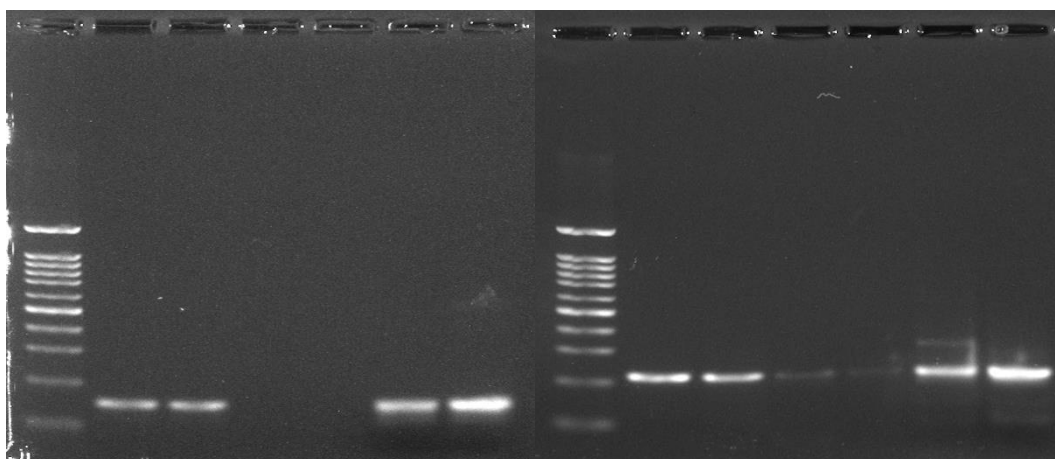

p-ATF2-MMP2

p-ATF2-MMP9

**Figure 5G**

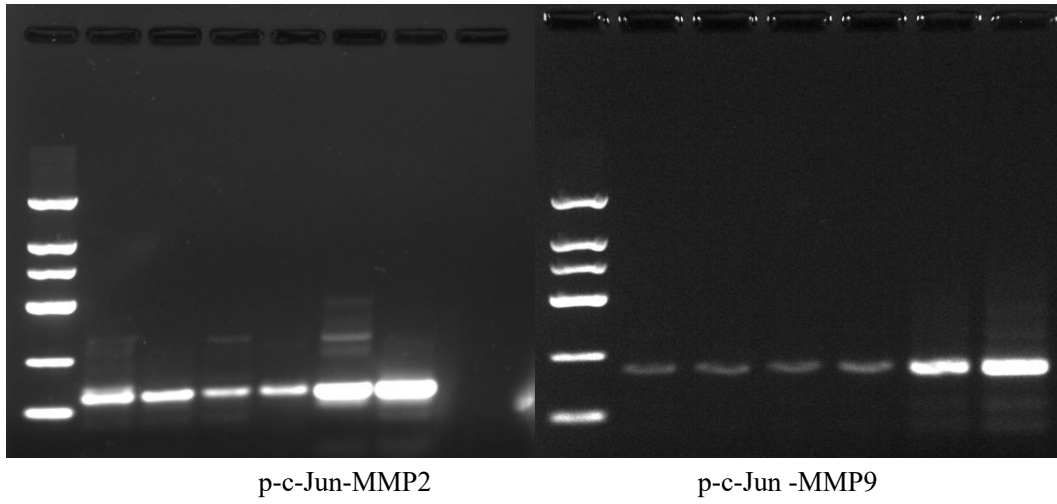

**Figure 6B**

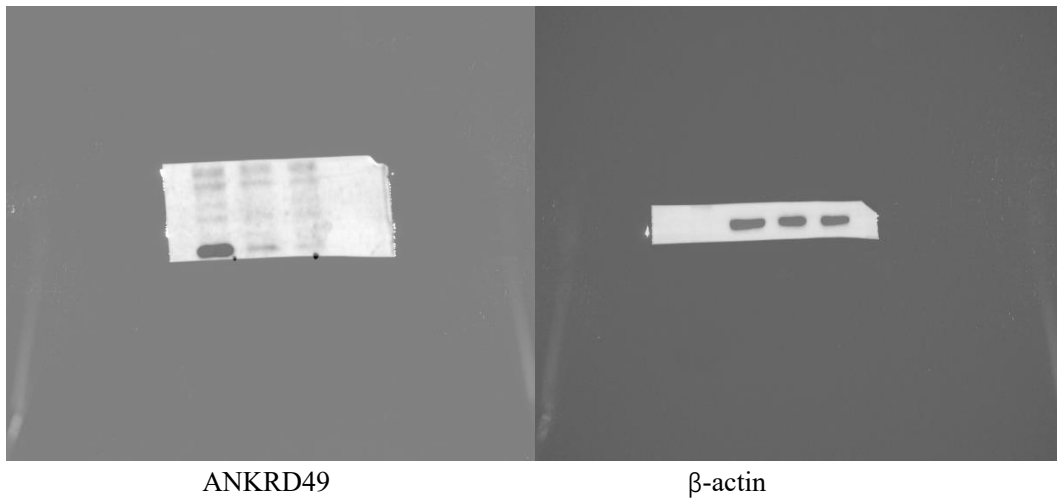

**Figure 7B**

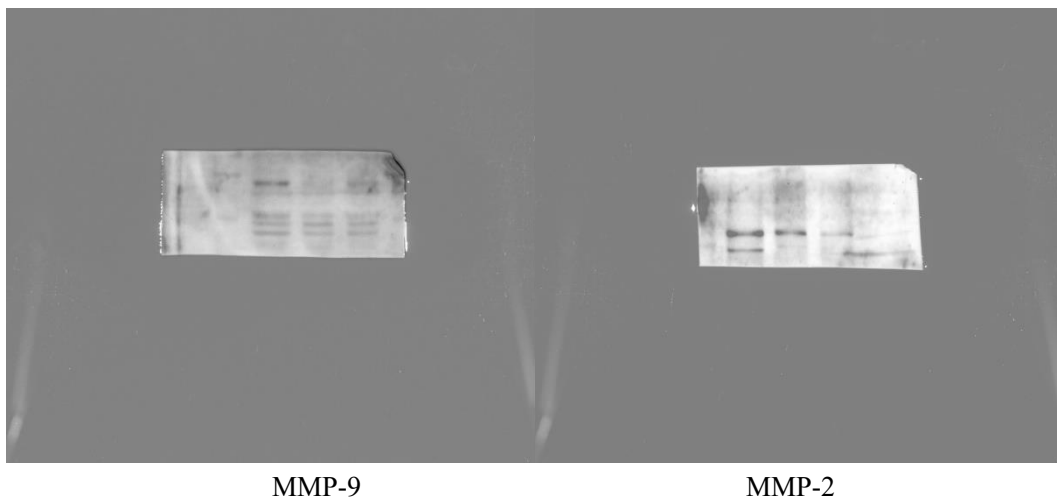

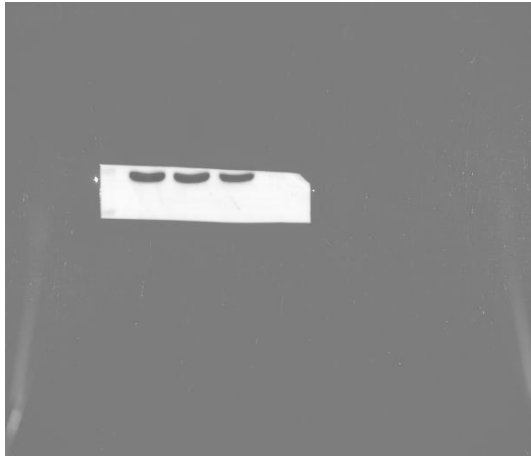

$\beta$ -actin

**Figure 7C**

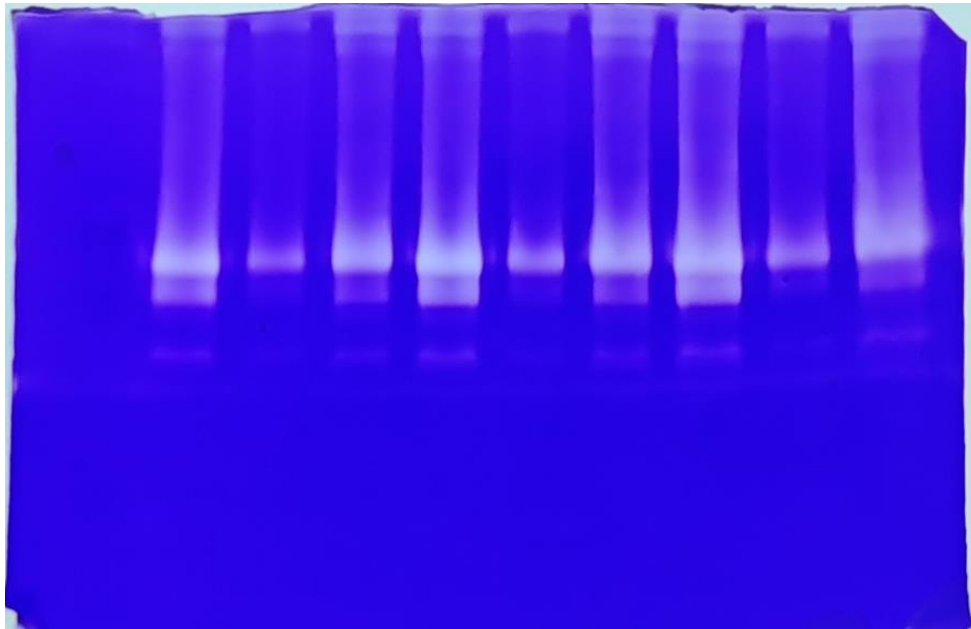

**Figure 7E**

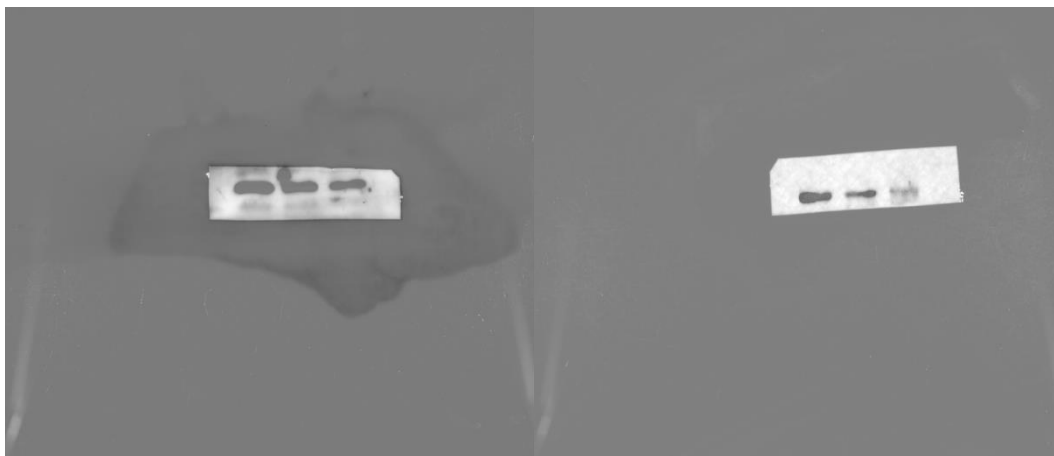

JNK

p-JNK

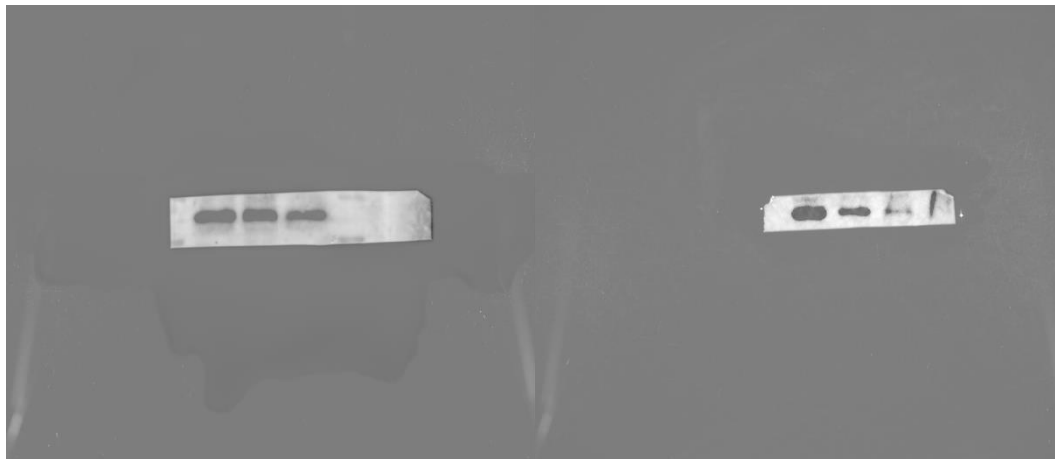

p38

p-p38

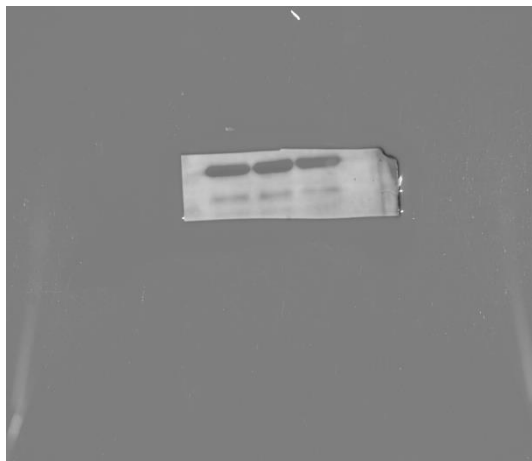

GAPDH

**Figure 7F**

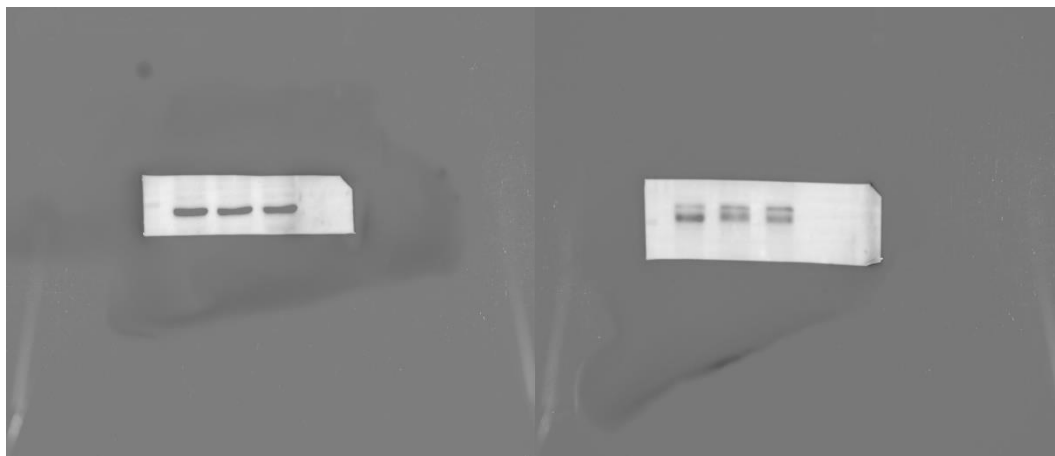

ATF2

p-ATF2



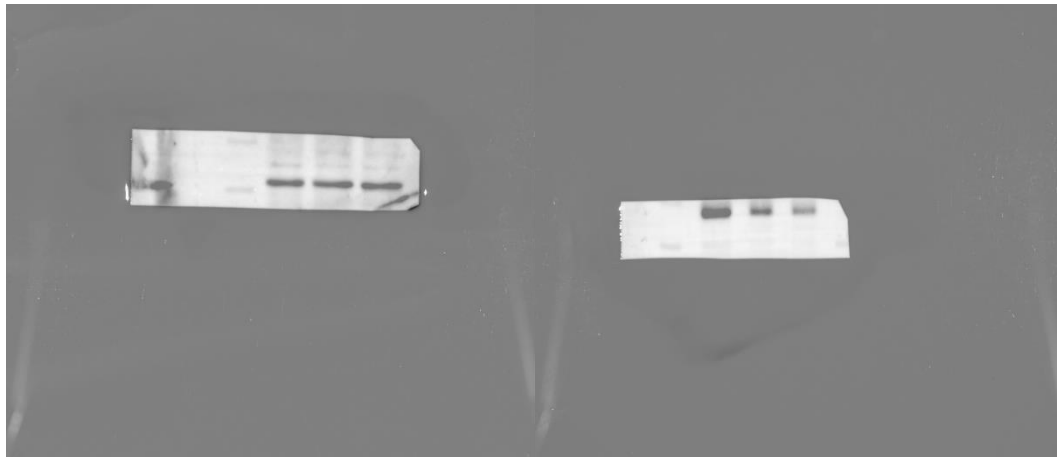

c-Jun

p-c-Jun

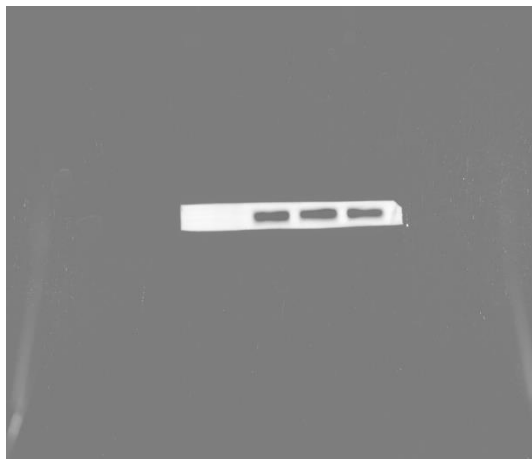

$\beta$ -Tubulin

**Figure 7G**

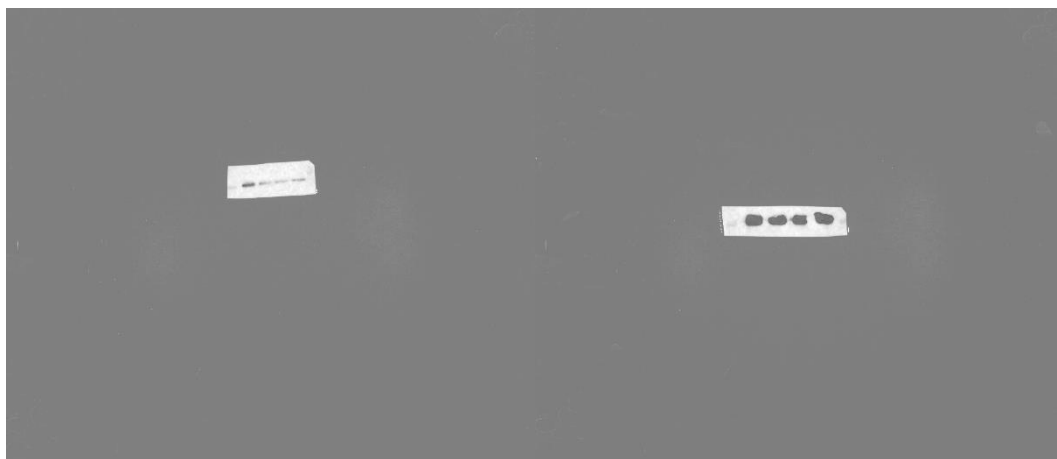

p-p38

p38

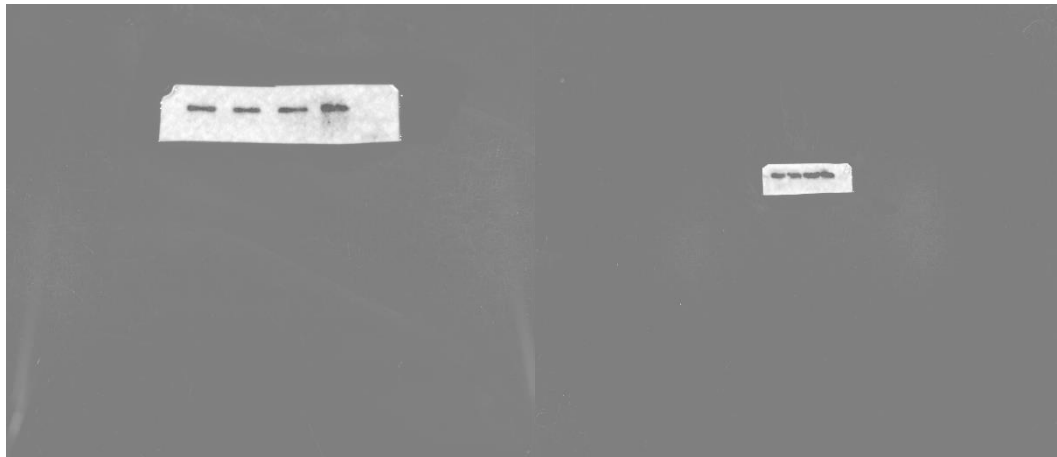

p-JNK

JNK

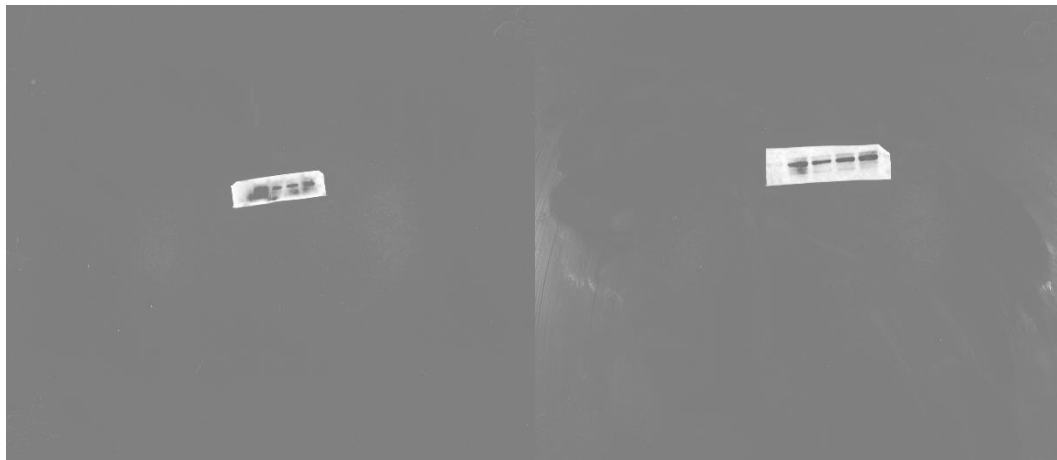

MMP-2

MMP-9

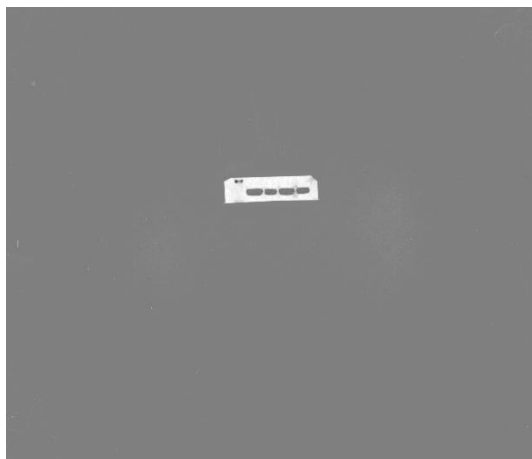

$\beta$ -Tubulin

**Figure 7H**

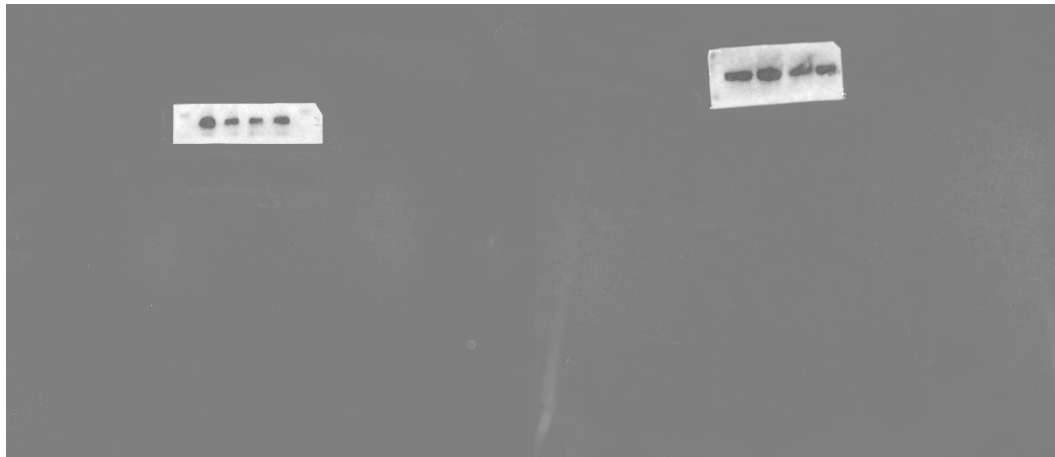

p-p38

p38

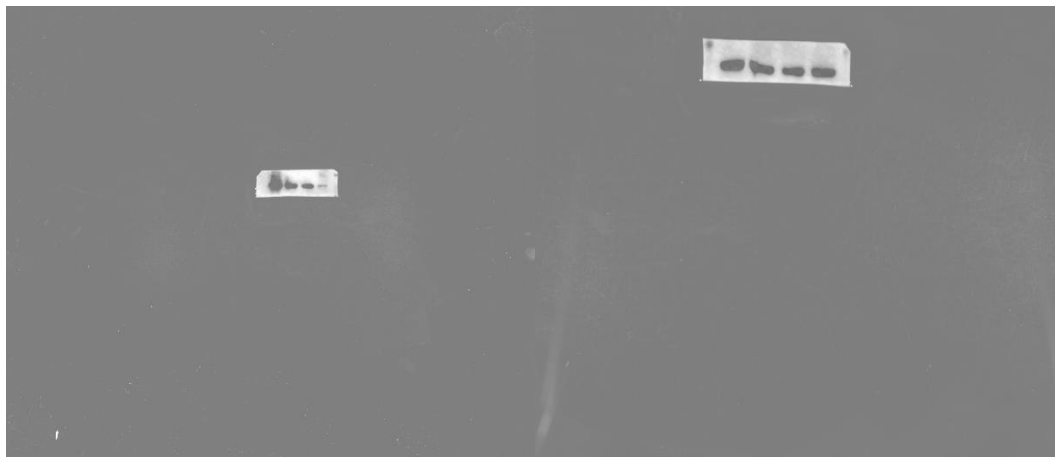

p-JNK

JNK

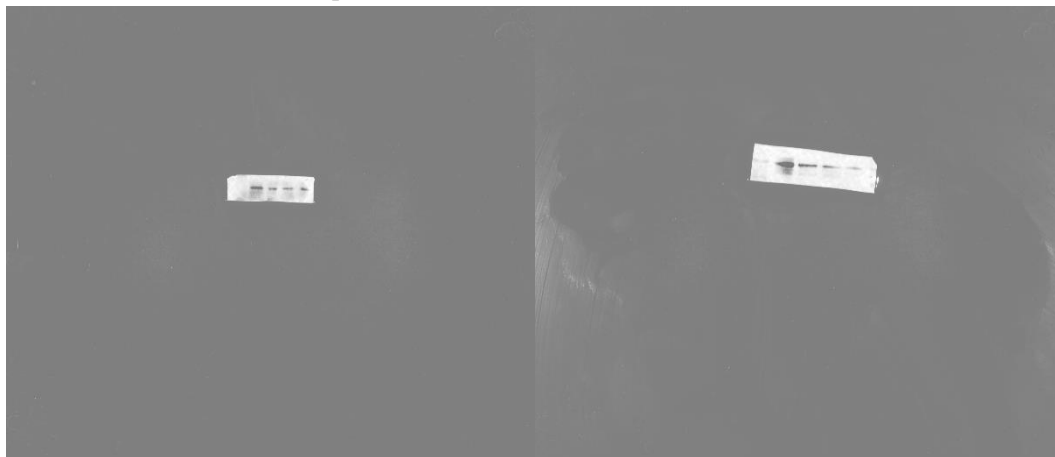

MMP-2

MMP-9

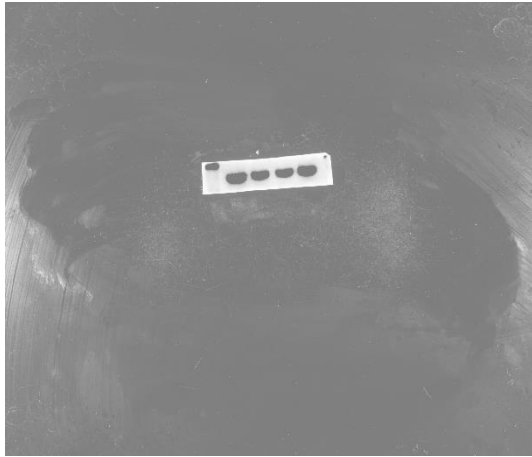

$\beta$ -Tubulin
